# Supplementary material for: Estimating blue whale skin isotopic incorporation rates and baleen growth rates: Implications for assessing diet and movement patterns in mysticetes
Source: PLoS One. 2017 May 31;12(5):e0177880. doi: 10.1371/journal.pone.0177880 (PMC5451050; doi:10.1371/journal.pone.0177880)
Supplement: S6 Table — (DOCX) [file pone.0177880.s010.docx]

**S6 Table. GLM results relating blue whale skin δ15N values to time (Julian date) in the Gulf of California (GC), California Current System (CCS) and Costa Rica Dome (CRD).**

| Zone | n | Model | Coefficient ± SME | CI (95%) | *t* | Residual deviance | df | AIC | *P* |
| --- | --- | --- | --- | --- | --- | --- | --- | --- | --- |
| GC | 267 | δ15Nskin =12.4 + 1.8e-4·timea | α = 12.4 ± 0.6  β = 1.8e-4 ± 4.7e-5 | 11.2 – 13.7  8.5e-5 – 3.0e-4 | 3.8 | 190.6 | 265 | 673.8 | **< 0.001** |
| CCS | 276 | δ15Nskin =10.5 + 2.2e-4·timea | α = 10.5 ± 0.4  β = 2.2e-4 ± 3.0e-5 | 9.7 – 11.2  2.0e-4 – 2.8e-4 | 7.3 | 184.9 | 274 | 678.7 | **< 0.001** |
| CRD | 16 | δ15Nskin =22 - 9.1e-4·timea | α = 22 ± 7.0  β = -9.1e-4 ± 6.3e-4 | 8.2 – 35.8  -2.0e-3 – 3.3e-4 | -1.4 | 11.4 | 14 | 46.0 | 0.2 |

α, intercept parameter; β, slope parameter; SME, standard error of the mean; CL, confident intervals of the mean; *t*, test values; *P*, p values reported, values in bold were considered statistically significant (<0.05).

**a**time, in the model represents number of days.
